# Supplementary material for: A narrative review of hydrogen-oxygen mixture for medical purpose and the inhaler thereof
Source: PubMed Central journal article supplement — Med Gas Res. 2020 Sep 27;10(4):193–200. doi: 10.4103/2045-9912.295226 (PMC8092144; doi:10.4103/2045-9912.295226), 2020-09-27
Supplement: MGR-10-193_Suppl1.pdf [file MGR-10-193_Suppl1.pdf]

The references cited in this article are mainly based on search of the published literature in Internet and electronic databases, such as PubMed, Science Direct, and Wiley Online Library, etc. Related papers or publications were selected and reviewed based on the search terms, including but not limited to “hydrogen”, “medical gas”, “cancer”, “respiratory”, “inhaler”, “explosion”, and “Asclepius Meditec”, etc.
